# Supplementary material for: Laboratory data linking the reconfiguration of and drag on individual plants to the velocity structure and wave dissipation over a meadow of salt marshes under waves with and without current
Source: Copernicus journal article supplement (doi:10.5194/essd-2023-372), 2023-10-25
Supplement: Supplementary file [file essd-2023-372-RC1-supplement.pdf]

General Attributes:

date\_created = 'xx/xx/xx'

Institution.....= xxxxx

.....Type of experiment = xxxxxx

When

Where

Sampling methods,

Instrument types,

Test case

Summary = 'Summary of experiment'

keywords = 'SeaDataNet Parameter Discovery Vocabulary'

keywords\_vocabulary = 'http://vocab.nerc.ac.uk/collection/'

principal\_investigator = xxxxx'

principal\_investigator\_email = xxxxx@xx.com'

Dimensions:

(Example)

TIME =

DEPTH =

COUNT... =

VARIABLES:

Current Velocity

Size: n x m

Dimensions: TIME

Datatype: double

Attributes:

long\_name = 'Velocity of the water column (currents)'

standard\_name = 'water\_velocity'

units = 'Metres per second'

coordinates = 'TIME

sdn\_parameter\_name = 'velocity of water current (Eulerian measurement) in the water body '  
sdn\_parameter\_urn = 'SDN:P01::LCEWAP01'  
sdn\_parameter\_uri = 'http://vocab.nerc.ac.uk/collection/P01/current/LCEWAP01/'  
sdn\_uom\_name = 'Metres per second'  
sdn\_uom\_urn = 'SDN:P06::UVAA'  
sdn\_uom\_uri = 'http://vocab.nerc.ac.uk/collection/P06/current/UVAA/'

For the standard name you can use the P07 vocabulary findable at address:  
<https://vocab.nerc.ac.uk/collection/P07/current/>

The most common vocabulary used to define variables and units are P01 and P06 findable at address:  
<https://vocab.nerc.ac.uk/collection/P01/current/> and : <https://vocab.nerc.ac.uk/collection/P06/current/>
